# Supplementary material for: Error-prone meiotic division and subfertility in mice with oocyte-conditional knockdown of pericentrin
Source: Oxford University Press journal article supplement (doi:10.1242/jcs.196188), 2017-02-14
Supplement: jcs196188supp.pdf [file jcs196188supp.pdf]

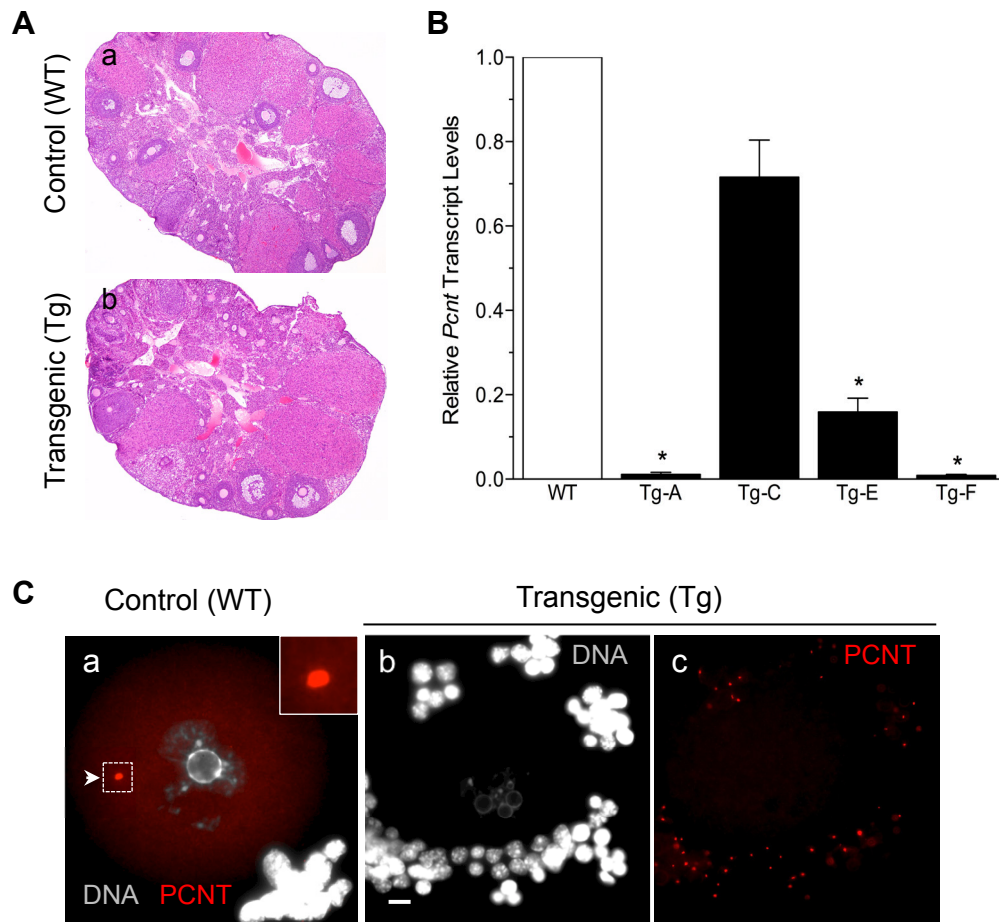

**Supplemental Fig. S1: Oocyte-conditional knockdown of *Pcnt* in transgenic mice.**

(A) Representative ovarian H&E stained tissue sections collected from control (WT) and transgenic (Tg) females at 4-months of age. (B) Quantitative RT-PCR analysis of the relative *Pcnt* levels in ovulated oocytes (n=100) from control WT and Tg females from Lines-A, -C-, E and -F. \*P<0.05 relative to WT. (C) Representative images of prophase-I (GV-stage) oocytes collected from WT and Tg females, labeled with anti-pericentrin. DAPI-labeled DNA is shown in grey and Pcnt in red. GC: Granulosa cells. Scale bar of 10  $\mu$ m

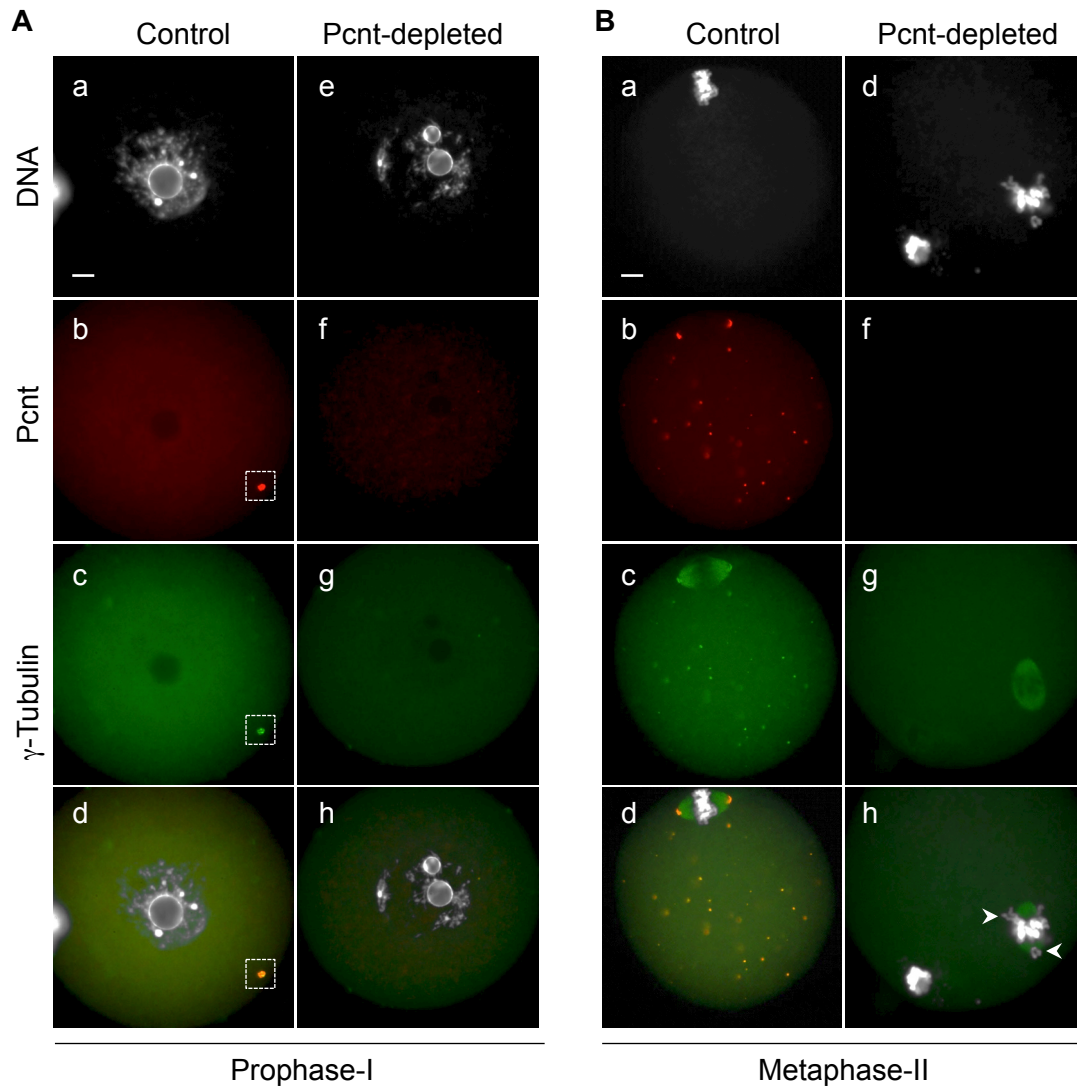

**Supplemental Fig. S2: Loss of Pcnt disrupts  $\gamma$ -tubulin distribution in oocytes.**

Representative images of (A) prophase-I arrested (GV-stage) oocytes and (B) ovulated MII oocytes collected from of WT control and Tg females. The oocytes were double-labeled with anti-pericentrin (red) and  $\gamma$ -tubulin (green) antibodies. DNA was counterstained with DAPI (grey). aMTOCs are highlighted by squares and arrows denote misaligned chromosomes. Scale bar of 10  $\mu$ m.

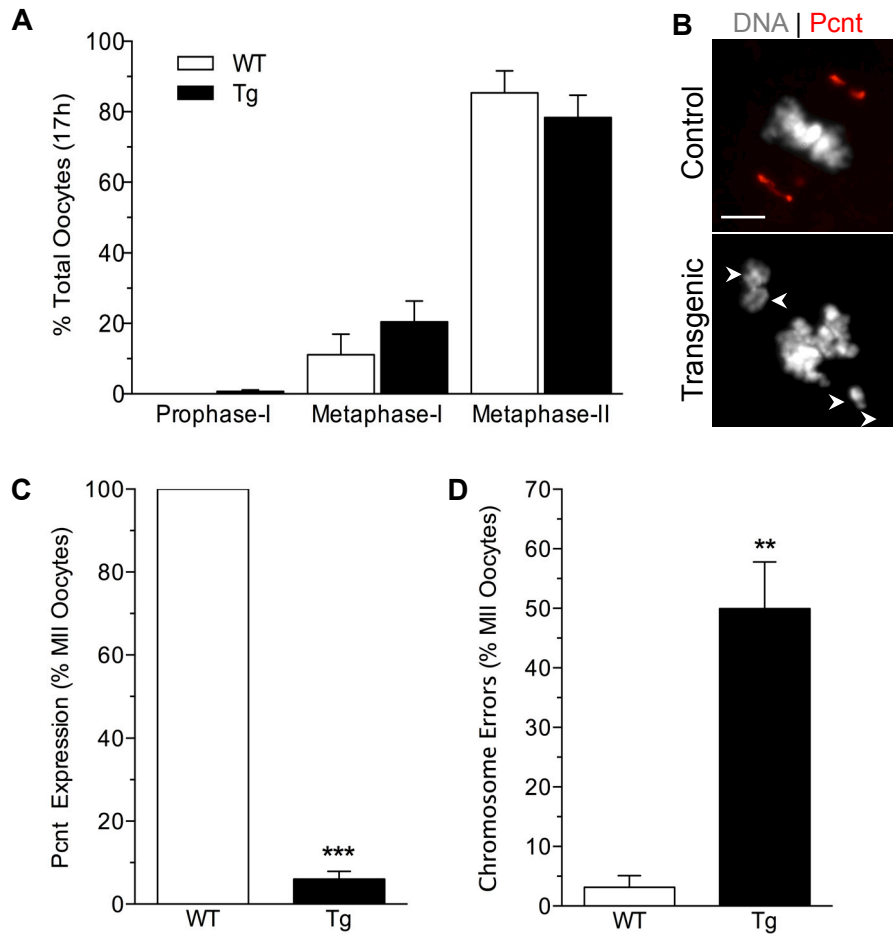

**Supplemental Fig. S3: *In vitro* maturation of WT and Tg oocytes.** (A) The progression of meiosis in WT control (n=95) and Tg (n=155) oocytes was evaluated after a 17h culture. Bars represent the percent ( $\pm$  s.e.m) total oocytes at each stage. (B) Representative images of WT and Tg oocytes at the end of culture. DAPI-labeled DNA is shown in grey and Pericentrin (Pcmt) in red. Arrows denote lagging chromosomes. Scale bar of 10  $\mu$ m. (C) Percent ( $\pm$  s.e.m.) of total WT and Tg oocytes that show positive Pcmt labeling. \*\*\*P<0.001 relative to WT. (D) Percent ( $\pm$  s.e.m.) of total WT and Tg oocytes with misalignment and lagging chromosomes. \*\*P<0.01 relative to WT.

**Supplemental Table S1:**

**Fertility Assessment of control (WT) and ZP3-*Pcnt* RNAi Transgenic (Tg) Mouse Lines**

|                                          | Line A         |                 | Line F        |                 |
|------------------------------------------|----------------|-----------------|---------------|-----------------|
|                                          | WT             | Tg              | WT            | Tg              |
| Mating Pairs                             | 3 <sup>§</sup> | 3               | 3             | 3               |
| Total Litters                            | 13             | 19              | 16            | 14              |
| Total Pups Born<br>(Viable / Total pups) | 151 / 160      | 93 / 123        | 159 / 172     | 39 / 53         |
| % Perinatal mortality                    | 5.6%           | 24.4%           | 7.5%          | 26.4%           |
| Total Pups / Litter<br>(mean ± s.e.m)    | 12.31 (±0.99)  | 6.47 (±0.50)**  | 10.75 (±0.82) | 3.79 (±0.45)*** |
| Viable Pups / Litter<br>(mean ± s.e.m)   | 11.62 (±0.93)  | 4.89 (±0.78)*** | 9.94 (±0.77)  | 2.79 (±0.59)*** |

\*\*P<0.01 relative to WT

\*\*\*P<0.001 relative to WT

§ 1 female in the WT group from Line-A died after 4.5 months of mating

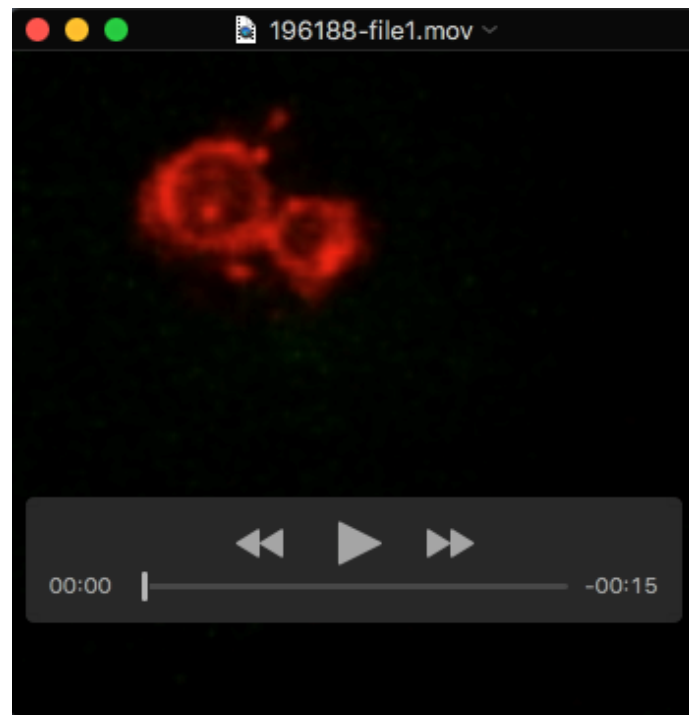

**Movie 1: Time-lapse of a control (WT) oocyte during *in vitro* maturation.** Time-lapse (20 minute intervals) movie of laser scanning confocal Z-stack reconstruction (every 5  $\mu\text{m}$ ) of WT oocytes expressing H2B-RFP (red) and MAP-4-EGFP (green) that label chromosomes and spindle microtubules, respectively.

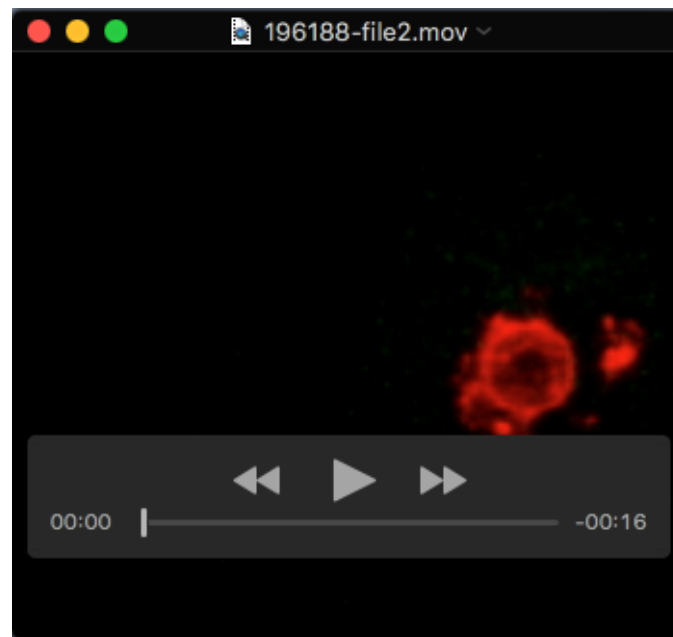

**Movie 2: Time-lapse of a transgenic (Tg) oocyte during in vitro maturation.** Time-lapse (20 minute intervals) movie of laser scanning confocal Z-stack reconstruction (every 5  $\mu\text{m}$ ) of Tg oocytes expressing H2B-RFP (red) and MAP-4-EGFP (green) that label chromosomes and spindle microtubules, respectively.

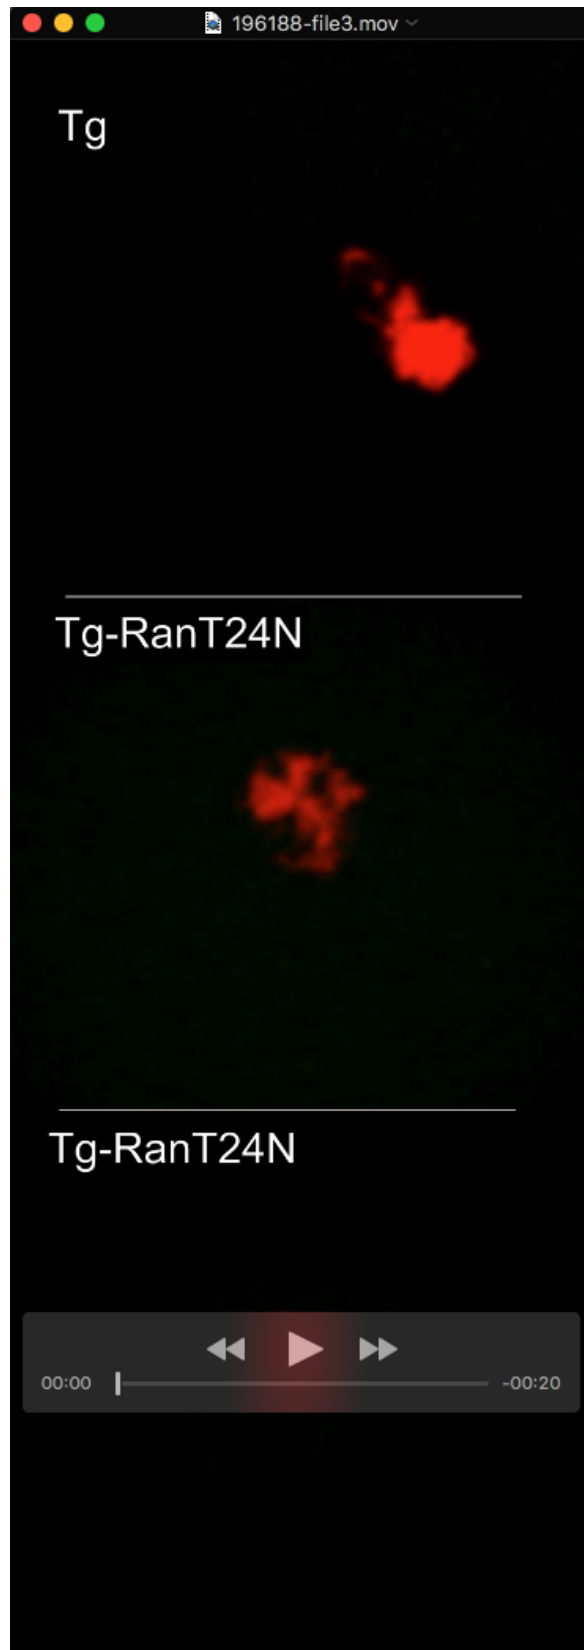

**Movie 3: Time-lapse of transgenic oocytes microinjected mutant Ran (Tg-RanT24N) relative to Tg control, during meiosis-I for 14h.** Time-lapse (15 minute intervals) movie of laser scanning confocal Z-stack reconstruction (every 5  $\mu\text{m}$ ) of Tg oocytes expressing H2B-RFP (red) and MAP-4-EGFP (green) that label chromosomes and spindle microtubules, respectively.
